# Supplementary material for: Cell fate determining molecular switches and signaling pathways in Pax7-expressing somitic mesoderm
Source: PubMed Central journal article supplement (PMC9240041; doi:10.1038/s41421-022-00407-0), 2022-06-28
Supplement: 41421_2022_407_MOESM1_ESM.pdf [file 41421_2022_407_MOESM1_ESM.pdf]

## Supplementary figures and figure legends

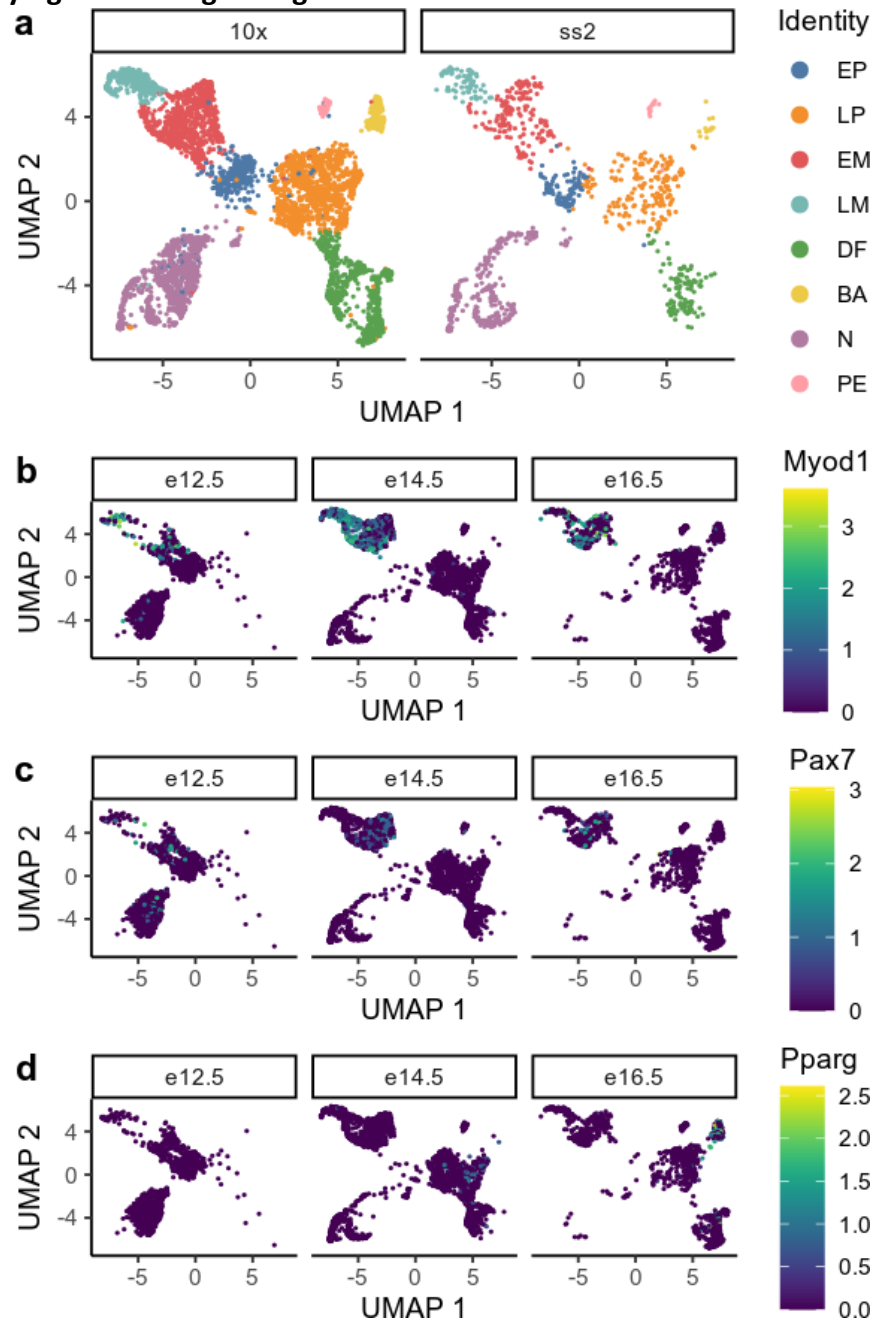

Supplementary Fig. S1: Integration result and cell type identification in Pax7 lineage, related to Fig. 1.

**a** UMAP visualization of integrated dataset labeled by identity and separated by library preparation method.

**b-d** UMAP visualization of integrated dataset colored by expression of: *Myod1* (b), *Pax7* (c), and *Pparg* (d), separated by embryonic time.

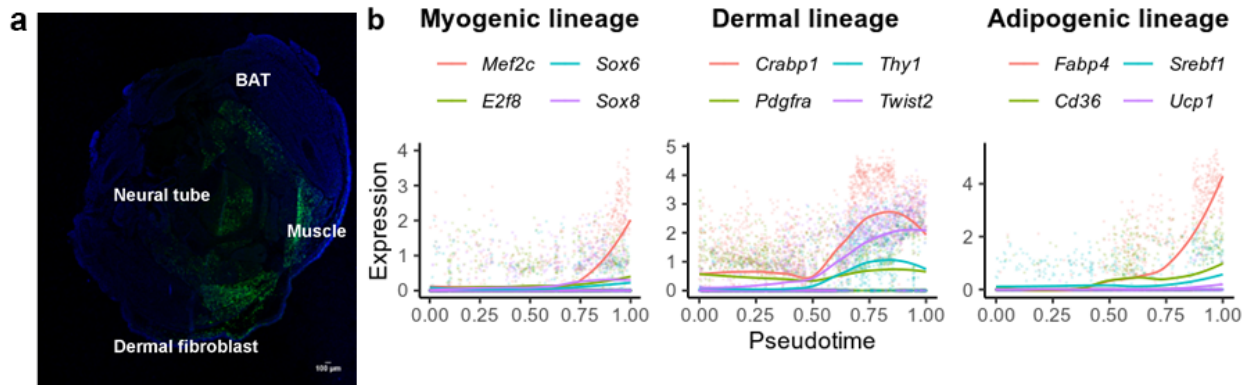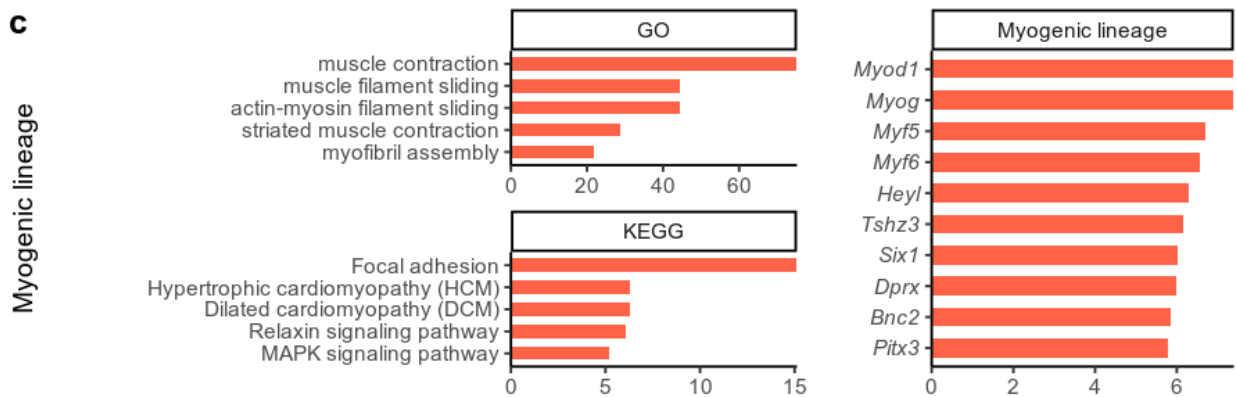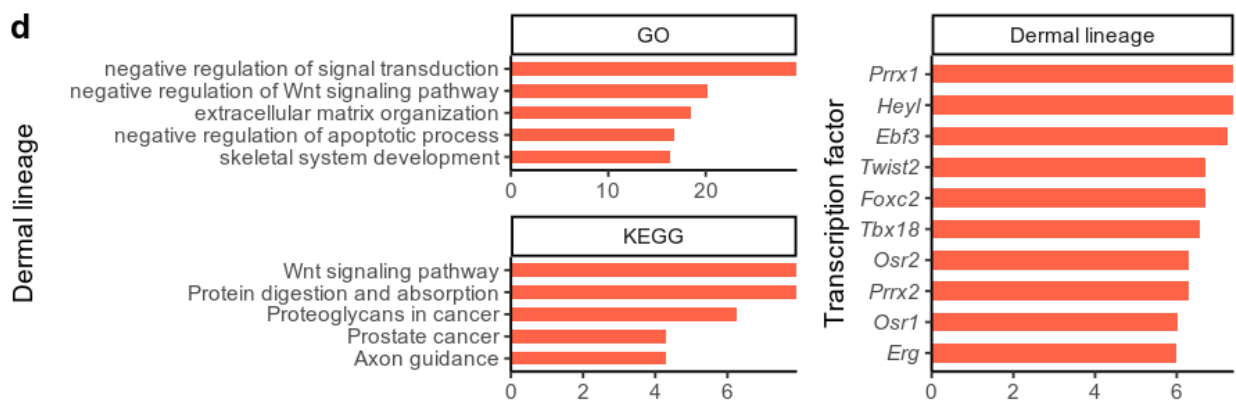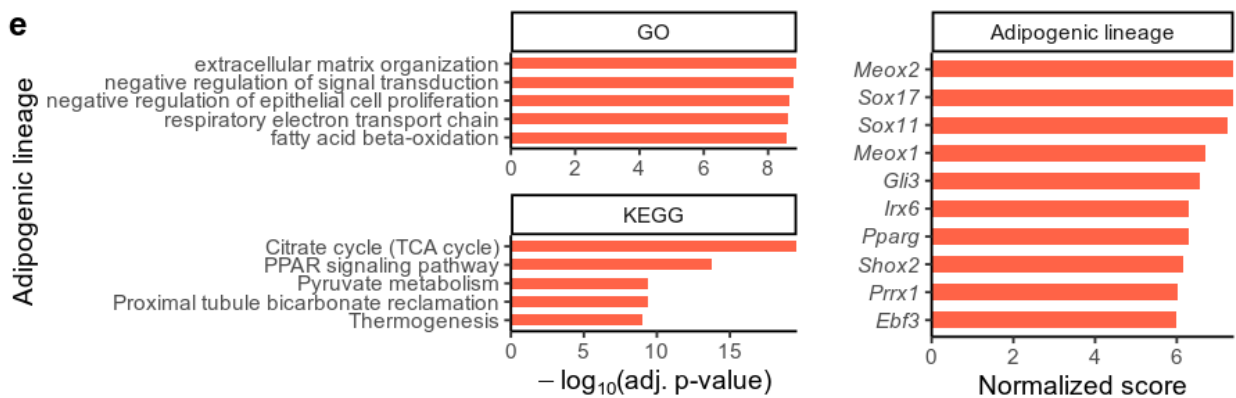

Supplementary Fig. S2: Pax7 lineage validation, additional temporal gene expression and gene term enrichment analysis, related to Fig. 2.

**a** Immunostaining of YFP on E16.5 mouse embryo cross-sections. Tamoxifen was injected at E9.5 and embryos were harvested at E16.5 and subjected to cryosection. YFP<sup>+</sup> cells were detected in the mesoderm regions including muscle, dermis, BAT, and also in dorsal neural tube. Scale bar: 100  $\mu$ m. Nuclei were counterstained with DAPI.

**b** Scatter plot of temporally expressed genes to ranked pseudotime. LOESS line of expression level was shown for each gene.

**c** Term enrichment analysis of the myogenic lineage with GO and KEGG using EnrichR and transcription factor using ChEA3.

**d** Term enrichment analysis of the dermal lineage.

**e** Term enrichment analysis of the adipogenic lineage.

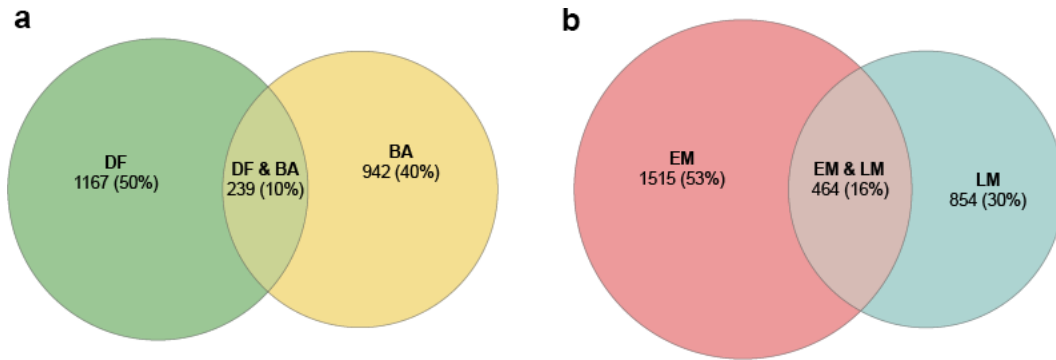

Supplementary Fig. S3: Venn diagram of highly variable genes, related to Fig. 3.

**a** Venn diagram of high variable genes between DF and BA.

**b** Venn diagram of high variable genes between EM and LM.

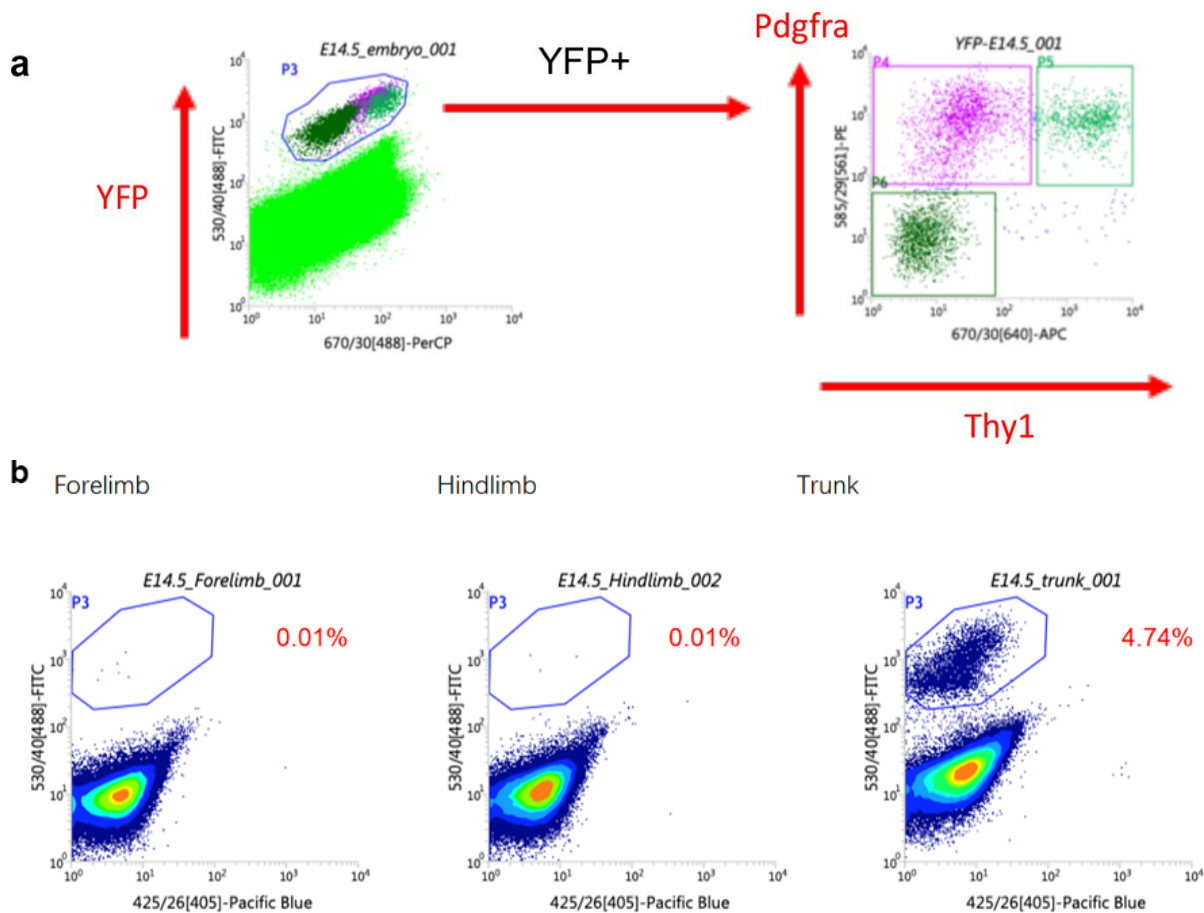

Supplementary Fig. S4: Sorting strategy validation by FACS, related to Fig. 4.

**a** FACS plot of Pax7-traced mouse embryos at E14.5. Embryos were labeled by TMX at E9.5 and harvested at E14.5.

**b** FACS plot of forelimb, hindlimb and trunk of E14.5 Pax7-traced mouse embryos. Few YFP+ cells were observed in both forelimb and hindlimb, while 4.74% of cells from trunk were YFP+ (percentage of detected events under area P3).

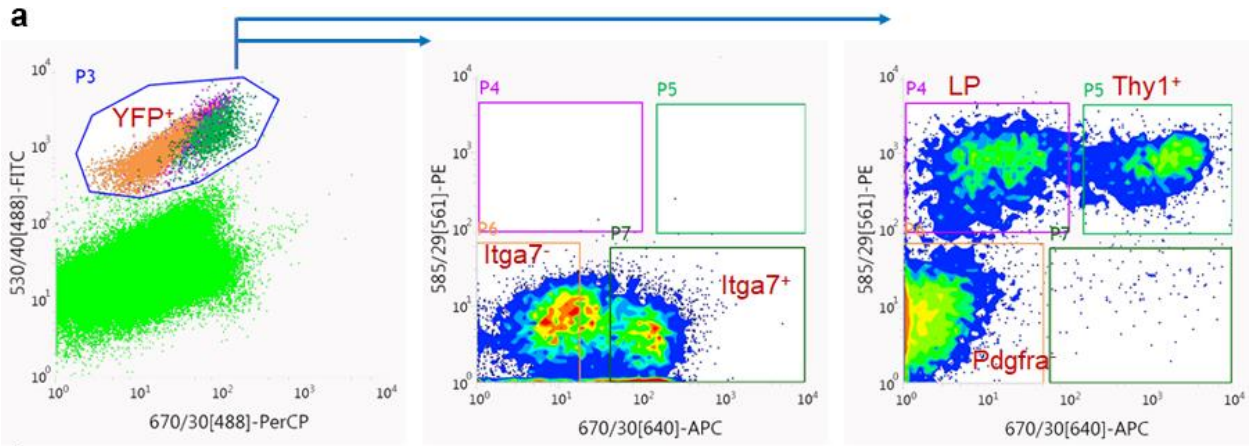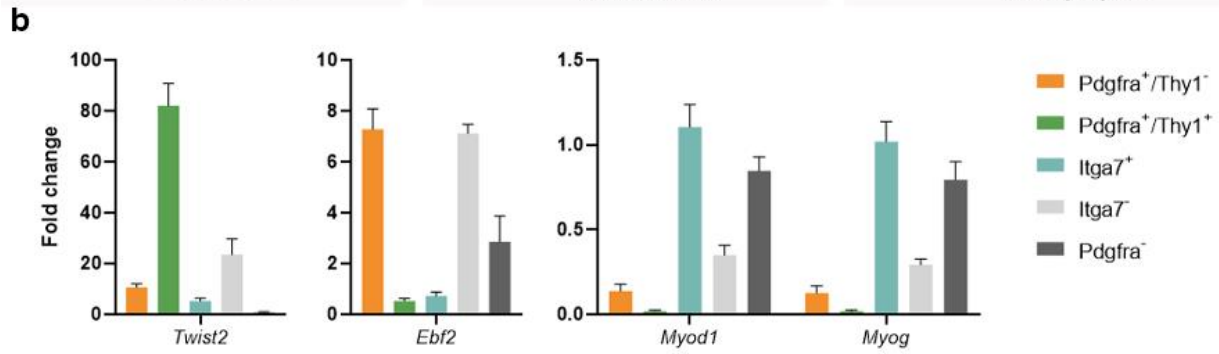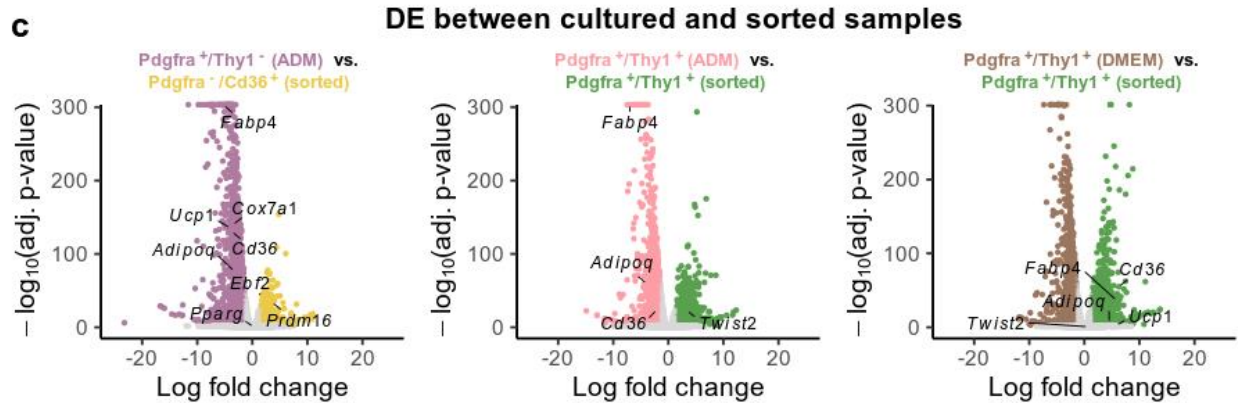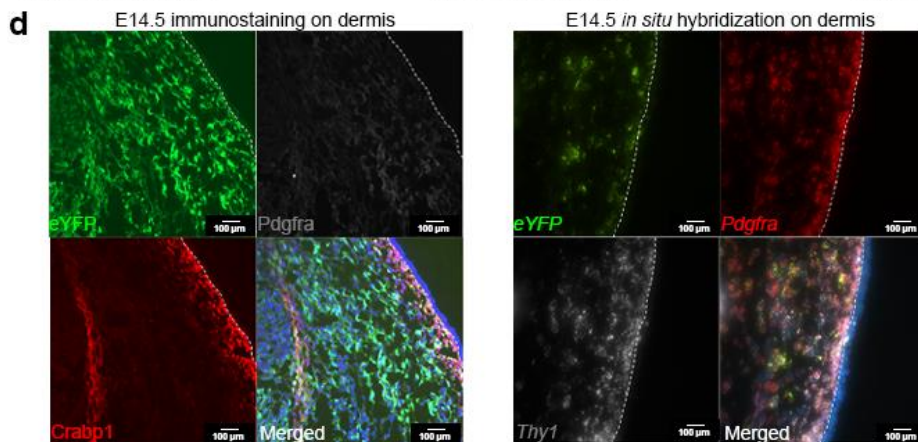

Supplementary Fig. S5: Gene expression validation in cells enriched by sorting strategy, related to Fig. 5.

**a** FACS plot of E14.5 Pax7 lineage-traced mouse embryos, with YFP signal indicated by y-axis. YFP<sup>+</sup> cells were further divided into subgroups by surface markers Thy1, Pdgfra, and Itga7.

**b** Bar chart showing RT-qPCR of *Twist2*, *Ebf2*, *Myod1* and *Myog* expressions in samples isolated by surface markers described in a. Expression of first replicate in Pdgfra<sup>-</sup> group were set as 1, expression levels in other group were normalized as fold change over normalized Pdgfra<sup>-</sup> group. Values are mean  $\pm$  SEM, n = 3.

**c** Volcano plots of differentially expressed genes between sorted and cultured samples. Genes with adjusted p-value < 0.01 were colored by orange (log-fold change > 1.5) or blue (log-fold change < -1.5), whereas  $\geq 0.01$  were colored as grey. Lineage markers and surface markers were labelled adjacent to corresponding dots.

**d** Section staining (left) and *in situ* hybridization (right) of E14.5 mouse embryo showing dermis. eYFP, Pdgfra and Crabbp1 signals, as well as eYFP, Pdgfra and *Thy1* were observed at dermis while only DAPI was observed at epidermis.

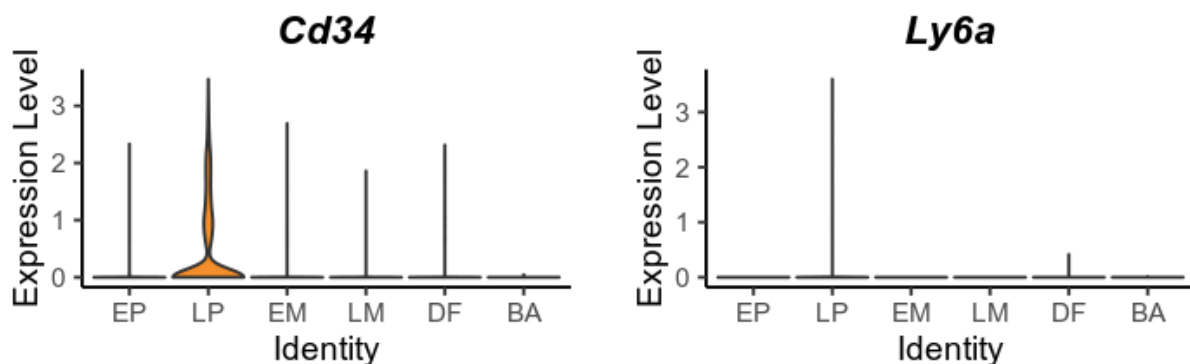

Supplementary Fig. S6: Violin plot of *Cd34* and *Ly6a* (Sca-1) expression in LP
